# Supplementary material for: Design, Synthesis and in Combo Antidiabetic Bioevaluation of Multitarget Phenylpropanoic Acids
Source: PubMed Central journal article supplement (PMC6017591; doi:10.3390/molecules23020340), 2018-02-06
Supplement: molecules-23-00340-s001.pdf [file molecules-23-00340-s001.pdf]

## Supporting Information

# Design, Synthesis and in combo Antidiabetic Bioevaluation of Multitarget Phenylpropanoic Acids †

Blanca Colín-Lozano <sup>1</sup>, Samuel Estrada-Soto <sup>1</sup>, Fabiola Chávez-Silva <sup>1</sup>, Abraham Gutiérrez-Hernández <sup>1</sup>, Litzia Cerón-Romero <sup>1</sup>, Abraham Giacoman-Martínez <sup>2</sup>, Julio Cesar Almanza-Pérez <sup>2</sup>, Emanuel Hernández-Núñez <sup>3</sup>, Zhilong Wang <sup>4</sup>, Xin Xie <sup>4</sup>, Mario Cappiello <sup>5</sup>, Francesco Balestri <sup>5</sup>, Umberto Mura <sup>5</sup> and Gabriel Navarrete-Vazquez <sup>1,\*</sup>

<sup>1</sup> Facultad de Farmacia, Universidad Autónoma del Estado de Morelos, Cuernavaca, Morelos 62209, Mexico; [clbi\\_ff@uaem.mx](mailto:clbi_ff@uaem.mx) (B.C.-L.); [enoch@uaem.mx](mailto:enoch@uaem.mx) (S.E.-S.); [facasy@gmail.com](mailto:facasy@gmail.com) (F.C.-S.); [ghaa\\_ff@uaem.mx](mailto:ghaa_ff@uaem.mx) (A.G.-H.); [crlc\\_ff@uaem.mx](mailto:crlc_ff@uaem.mx) (L.C.-R.)

<sup>2</sup> Laboratorio de Farmacología, Departamento de Ciencias de la Salud, Universidad Autónoma Metropolitana Iztapalapa, Ciudad de México 09340, Mexico; [agmfest@hotmail.com](mailto:agmfest@hotmail.com) (A.G.-M.); [j.almanza.perez@gmail.com](mailto:j.almanza.perez@gmail.com) (J.C.A.-P.)

<sup>3</sup> Cátedra CONACyT, Departamento de Recursos del Mar, Centro de Investigación y de Estudios Avanzados del IPN, Unidad Mérida, Yucatán 97310, Mexico; [emanuel.hernandez@cinvestav.mx](mailto:emanuel.hernandez@cinvestav.mx)

<sup>4</sup> CAS Key Laboratory of Receptor Research, the National Center for Drug Screening, Shanghai Institute of Materia Medica, Chinese Academy of Sciences, Shanghai 201203, China, [endlesslily@hotmail.com](mailto:endlesslily@hotmail.com) (Z.W.); [xxie@simm.ac.cn](mailto:xxie@simm.ac.cn) (X.X.)

<sup>5</sup> Dipartimento di Biologia, Unità di Biochimica, University of Pisa, 56126 Pisa, Italy; [mcappiello@biologia.unipi.it](mailto:mcappiello@biologia.unipi.it) (M.C.); [francesco.balestri@unipi.it](mailto:francesco.balestri@unipi.it) (F.B.); [umberto.mura@unipi.it](mailto:umberto.mura@unipi.it) (U.M.)

\* Correspondence: [gabriel\\_navarrete@uaem.mx](mailto:gabriel_navarrete@uaem.mx); Tel.: +52-777-329-7089

† Taking in part of the Ph. D. thesis of Blanca Colín-Lozano.

## REPRESENTATIVE SPECTRA

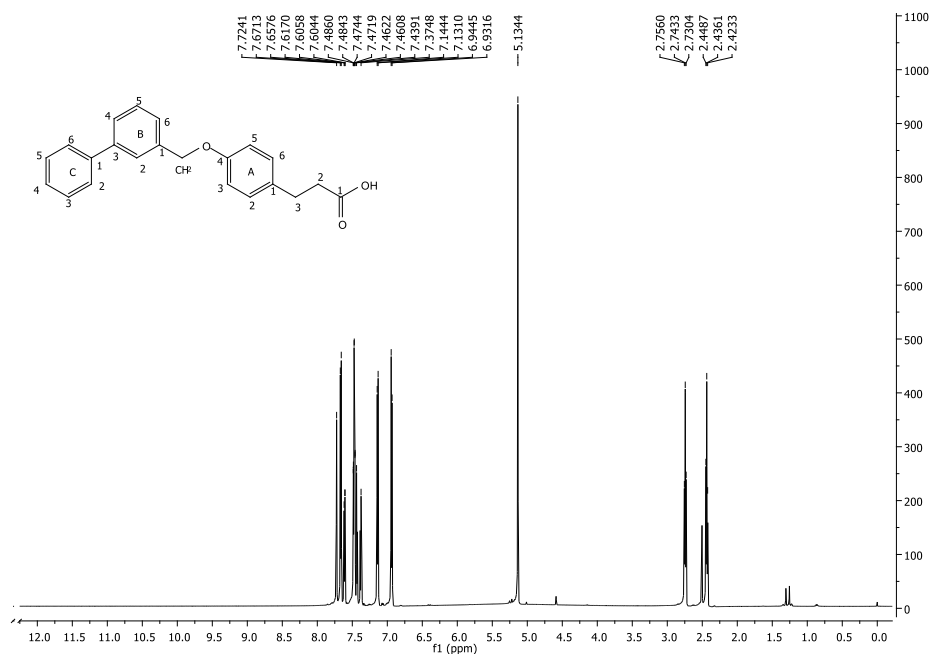

<sup>1</sup>H-NMR of compound 1

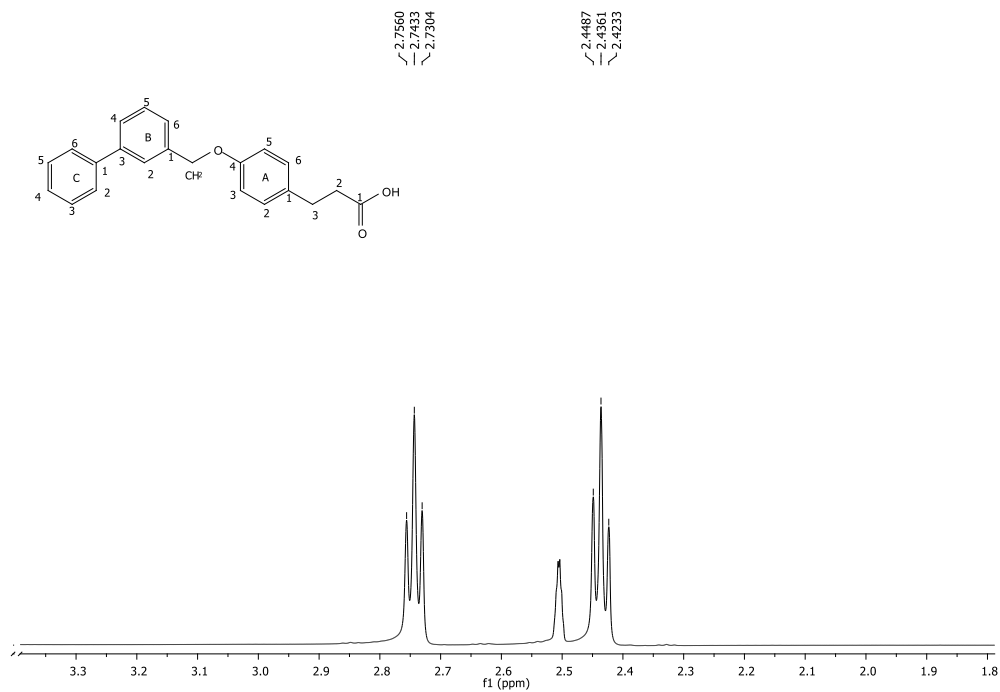

<sup>1</sup>H-NMR of compound 1 (aliphatic zone expansion)

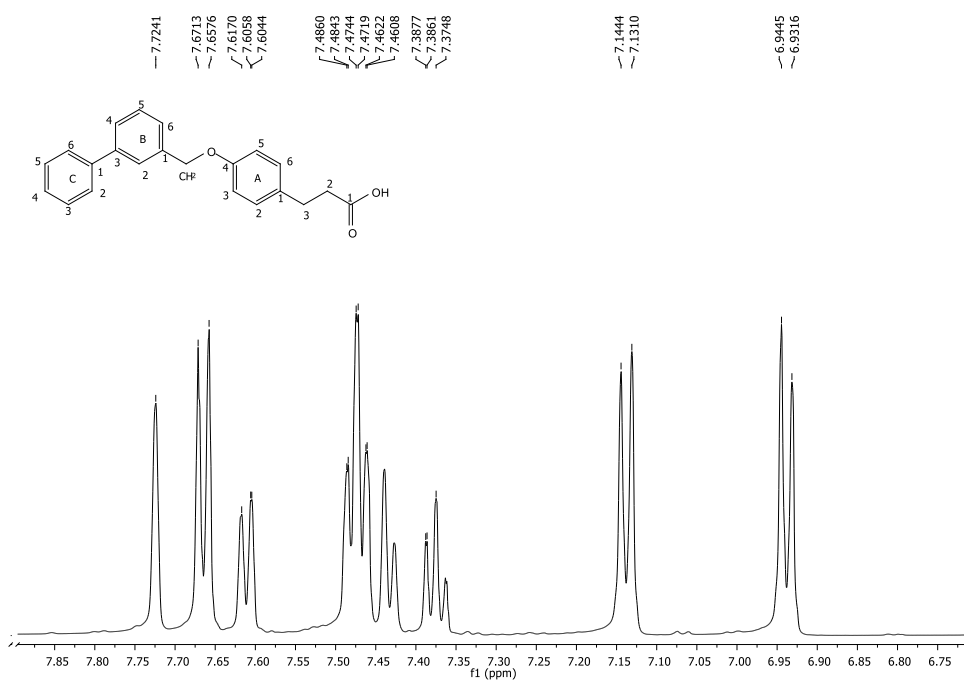

<sup>1</sup>H-NMR of compound 1 (aromatic zone expansion)

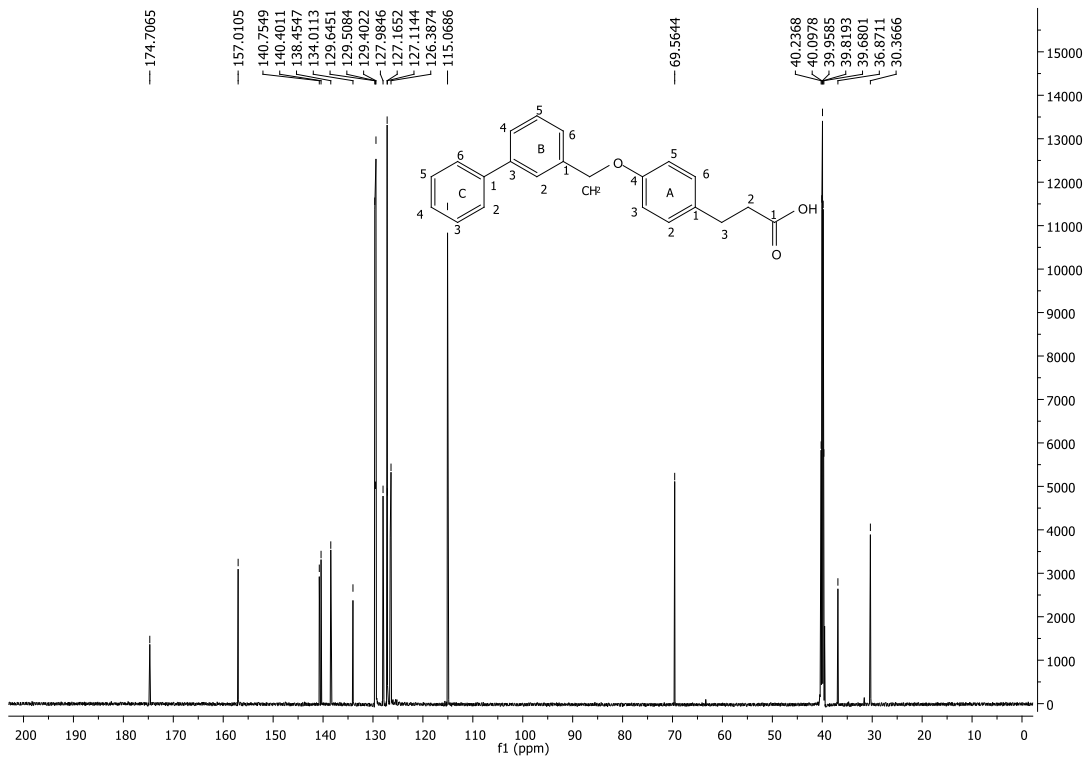

<sup>13</sup>C-NMR of compound 1

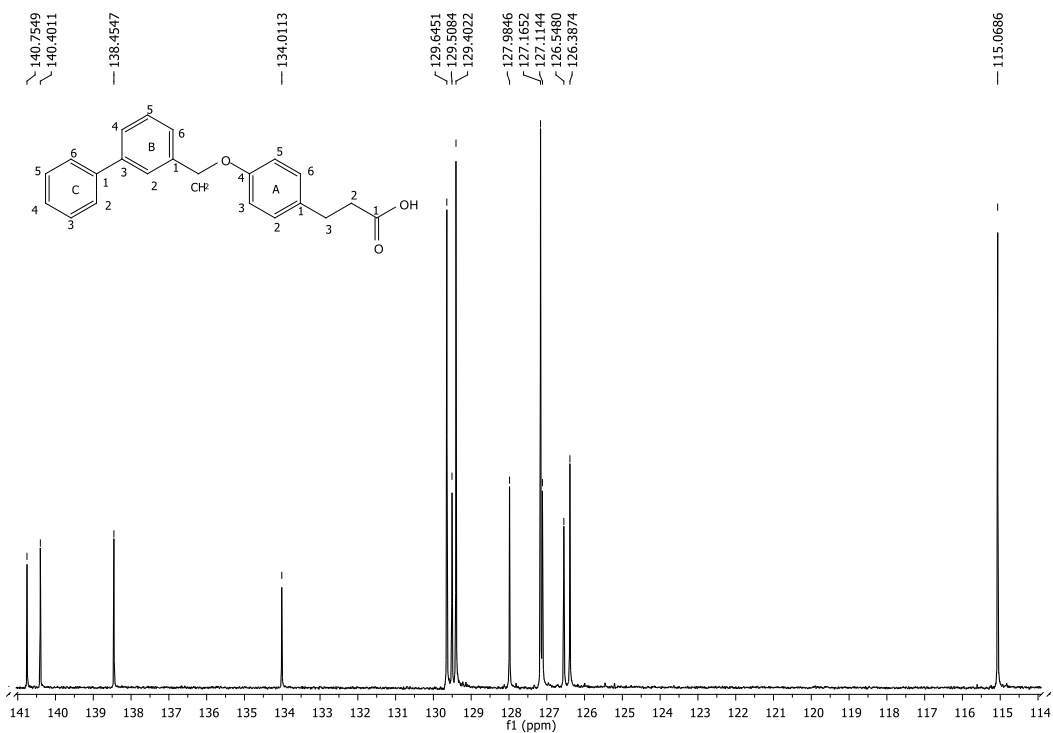

<sup>13</sup>C-NMR of compound 1 (aromatic zone expansion)

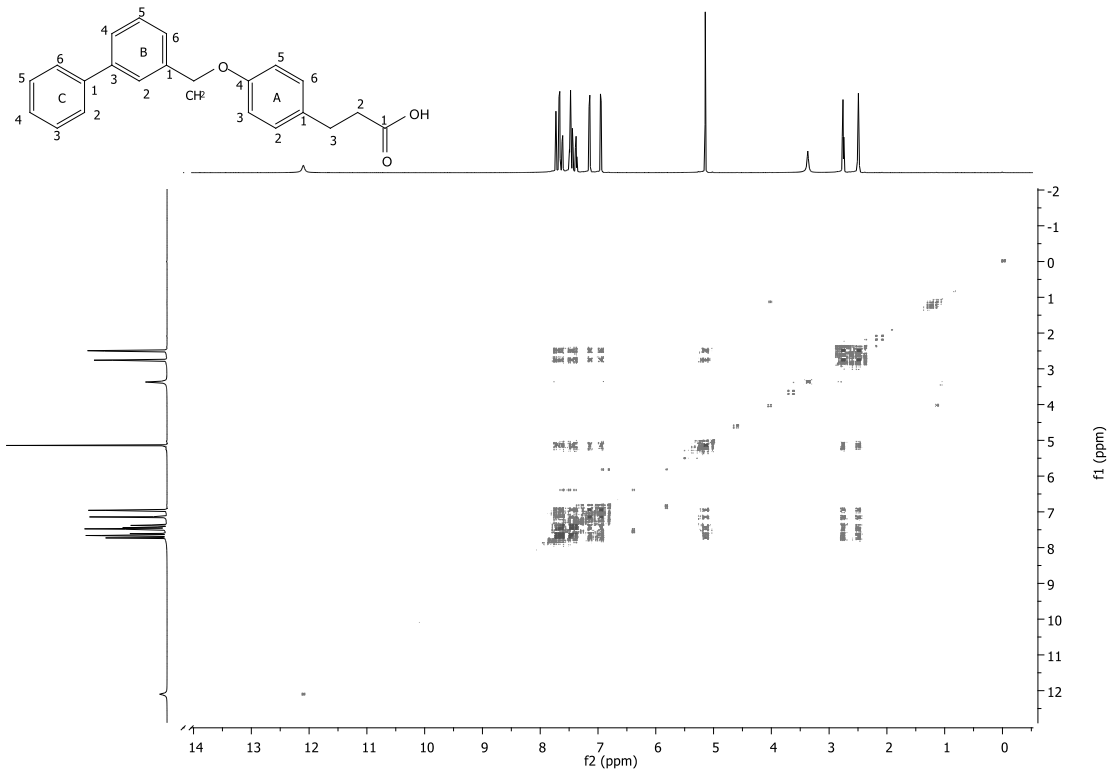

COSY of compound 1

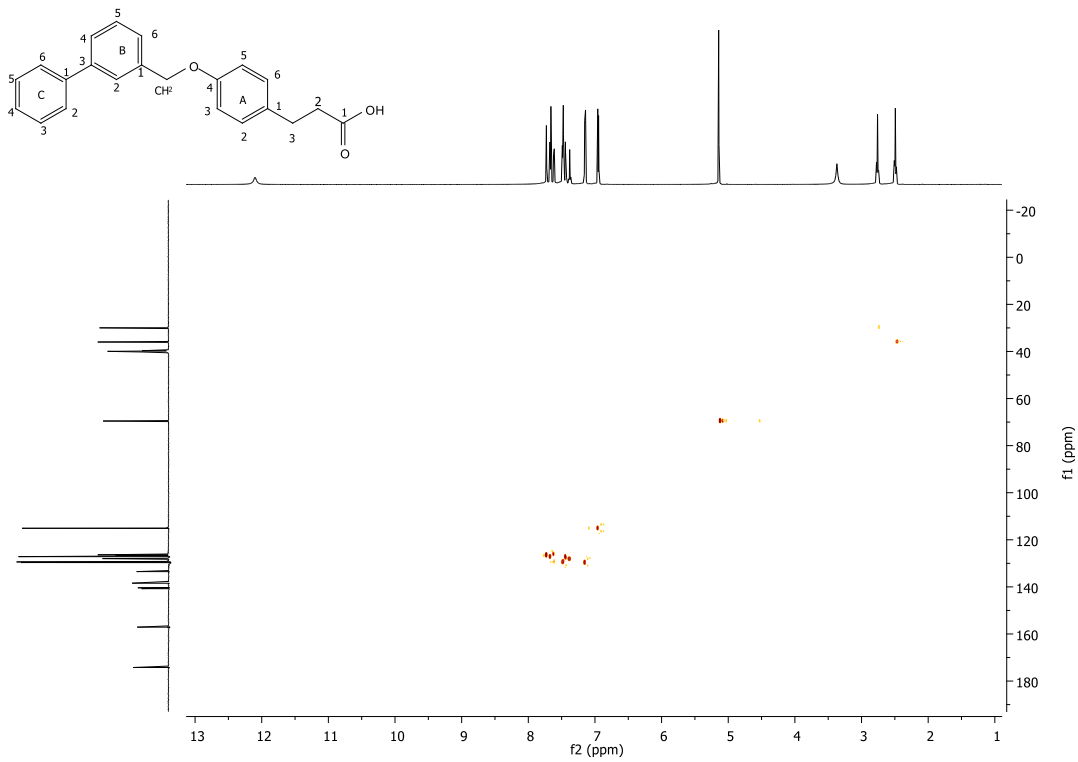

HSQC of compound 1

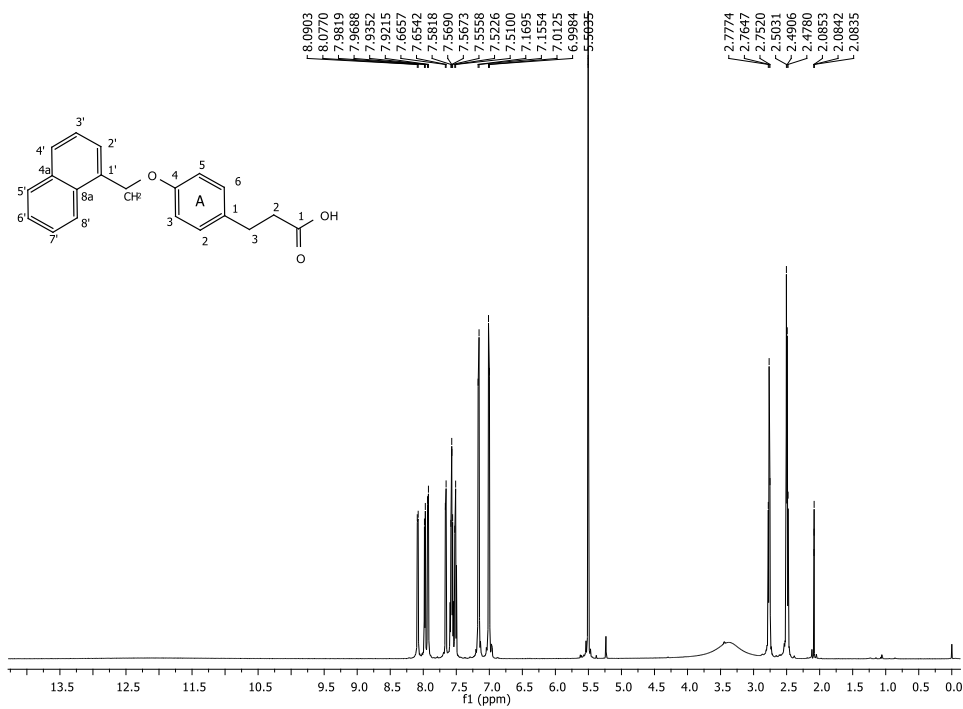

<sup>1</sup>H-NMR of compound 2

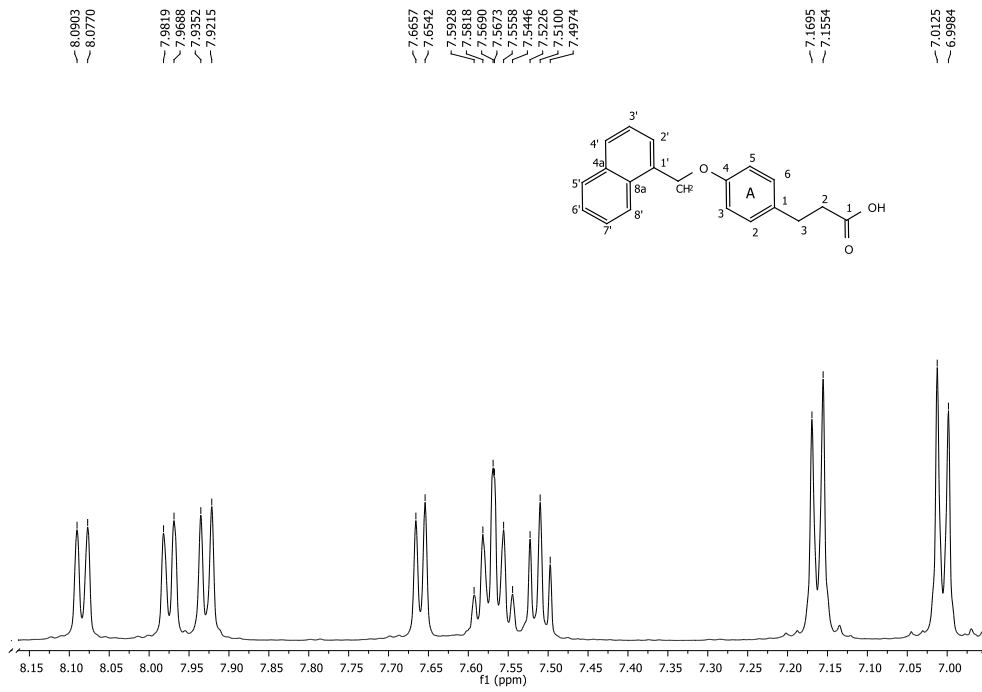

$^1\text{H-NMR}$  of compound 2 (aromatic zone expansion)

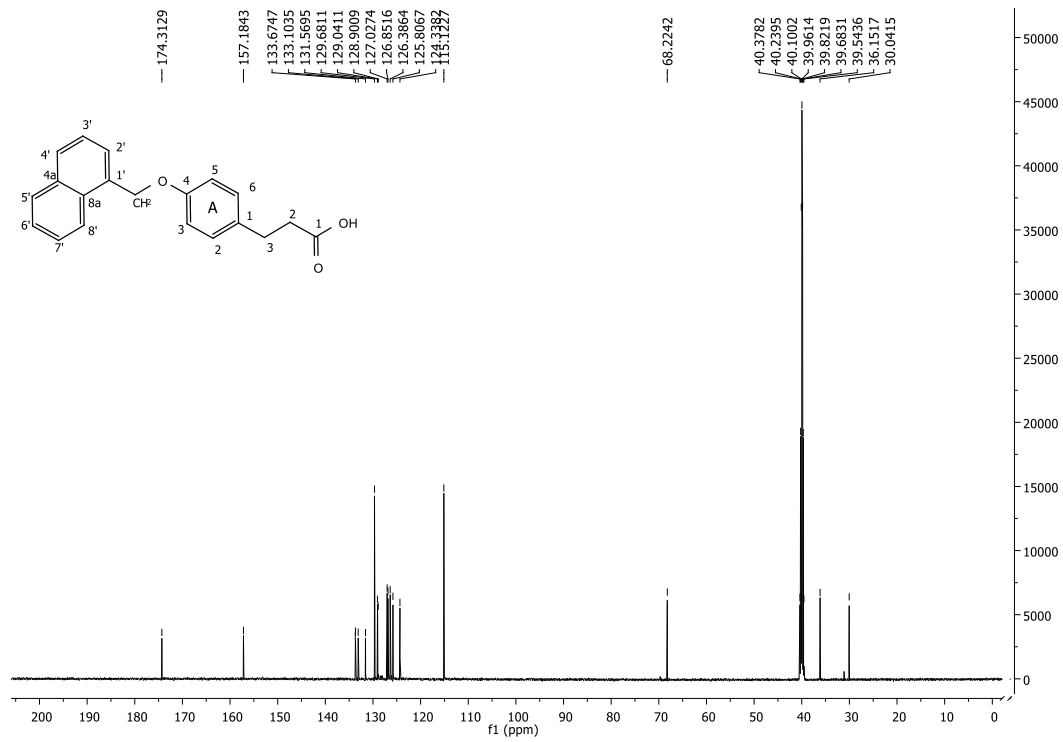

$^{13}\text{C-NMR}$  of compound 2

133.7153  
133.6747  
133.1035

131.5695

129.6811  
129.0411  
128.9009

127.0274  
126.8516  
126.3864  
125.8067

124.3382

115.1227

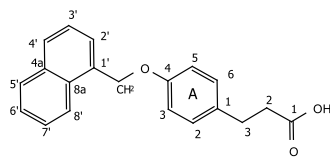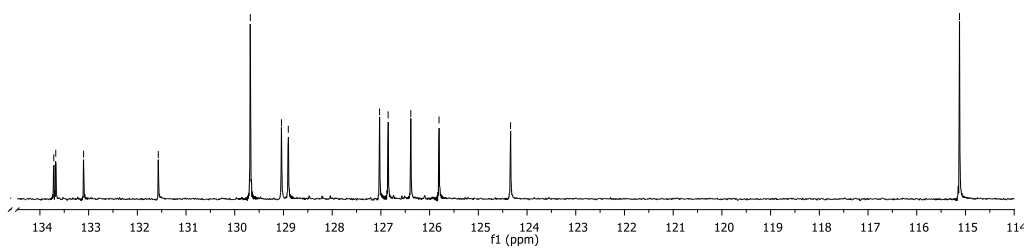

<sup>13</sup>C-NMR of compound 2 (aromatic zone expansion)

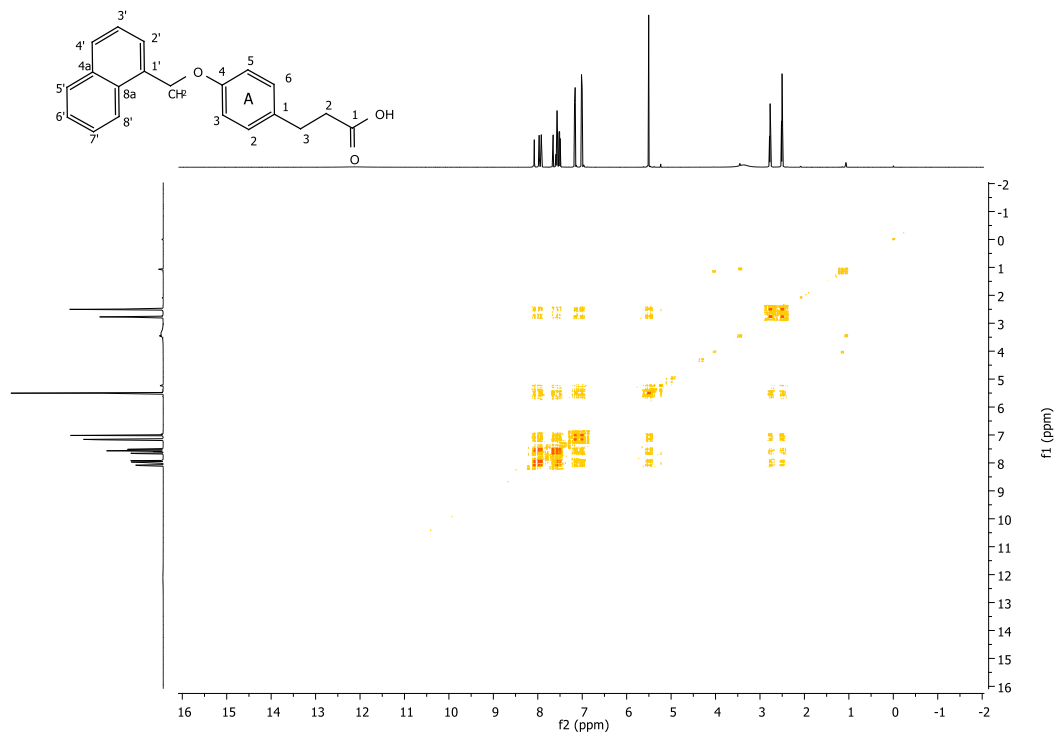

COSY of compound 2

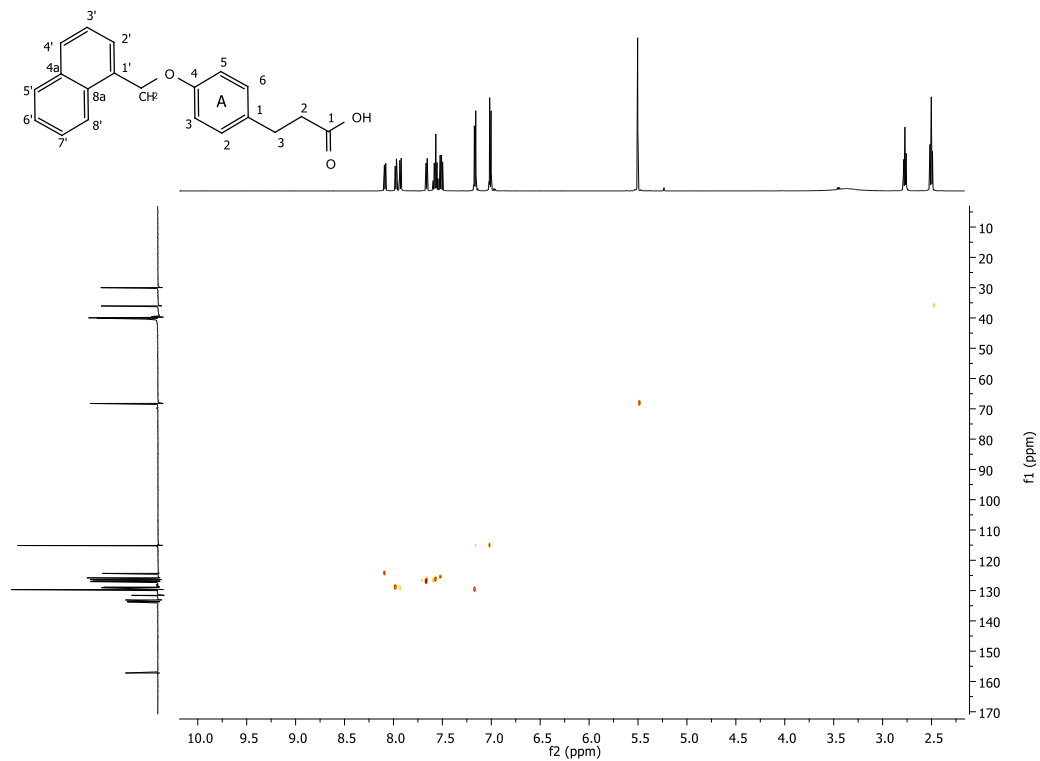

HSQC of compound 2

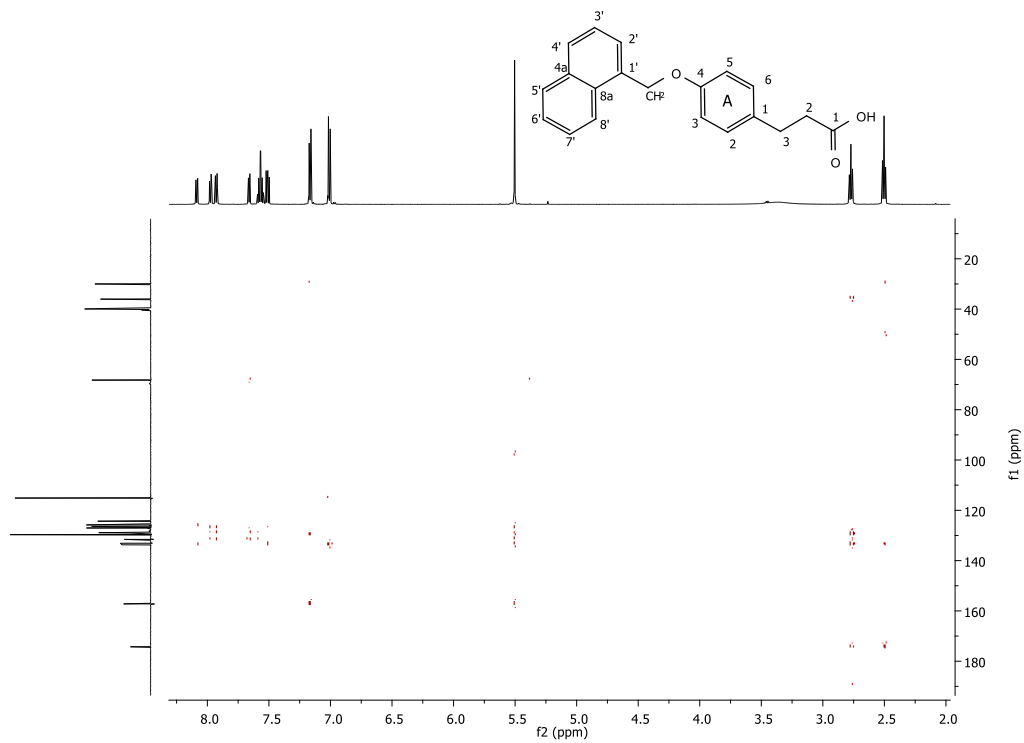

HMBC of compound 2





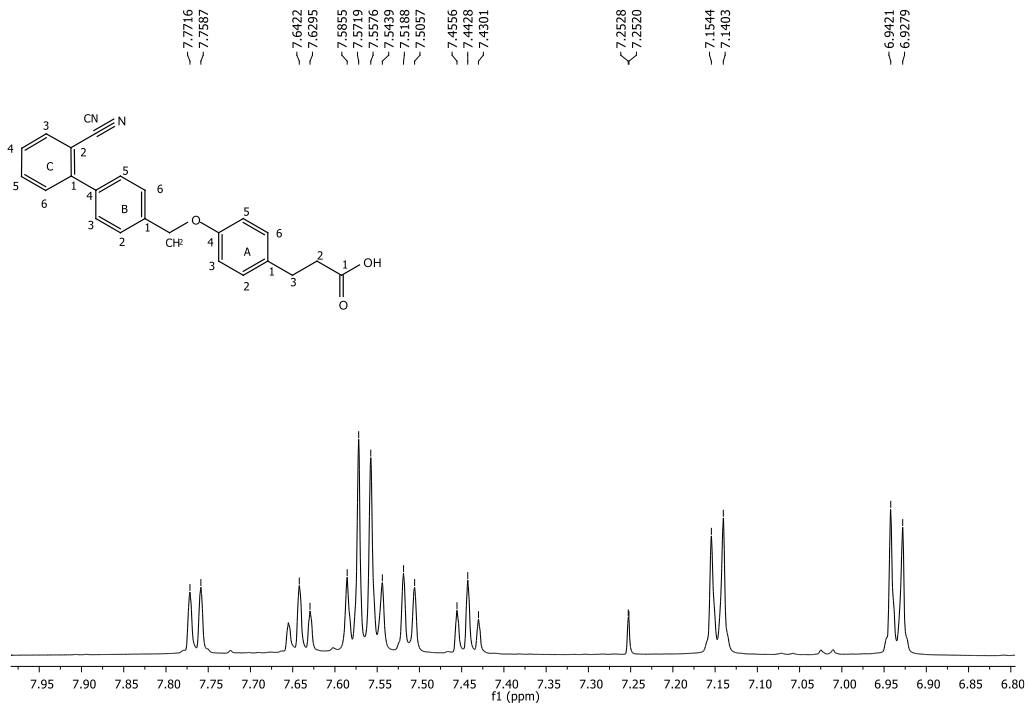

<sup>1</sup>H-NMR of compound 3 (aromatic zone expansion)

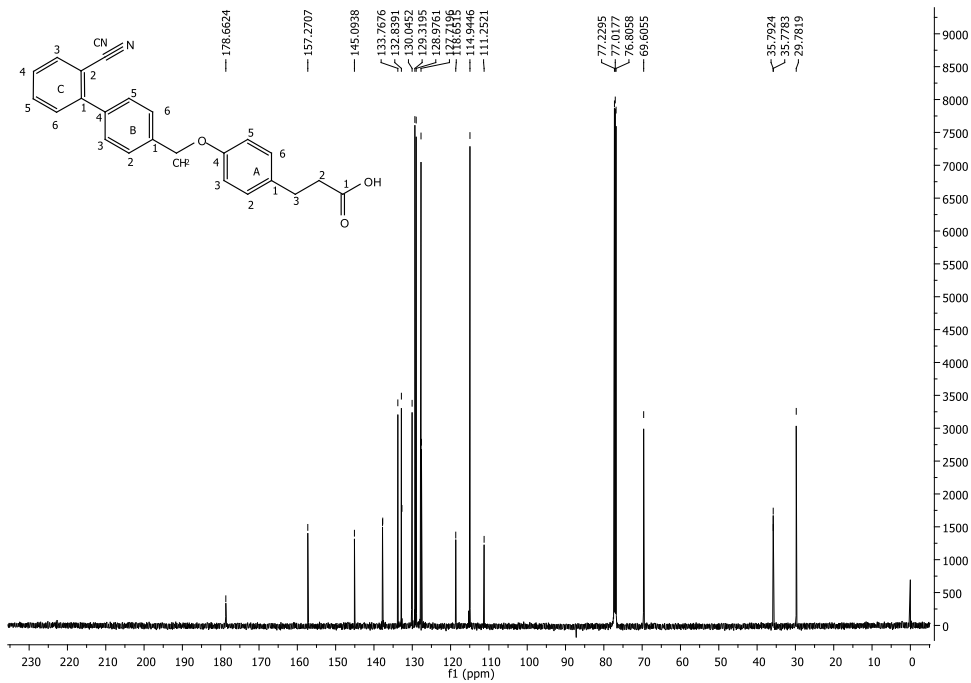

<sup>13</sup>C-NMR of compound 3

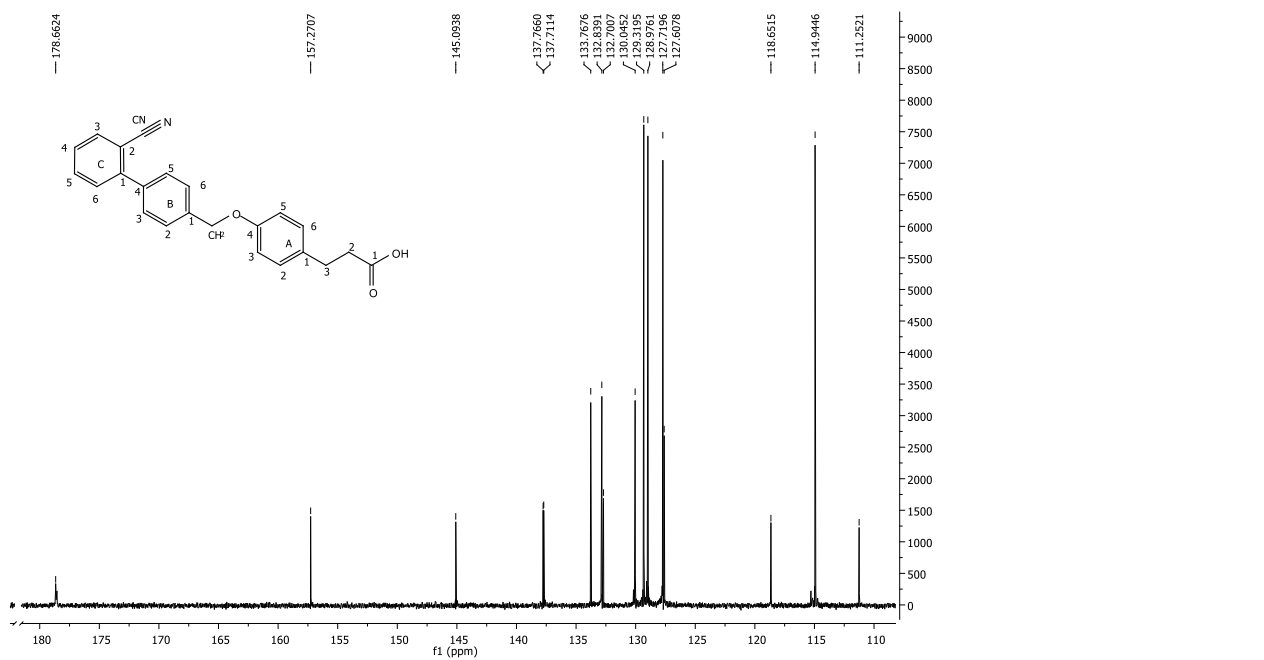

$^{13}\text{C}$ -NMR of compound 3 (aromatic zone expansion)

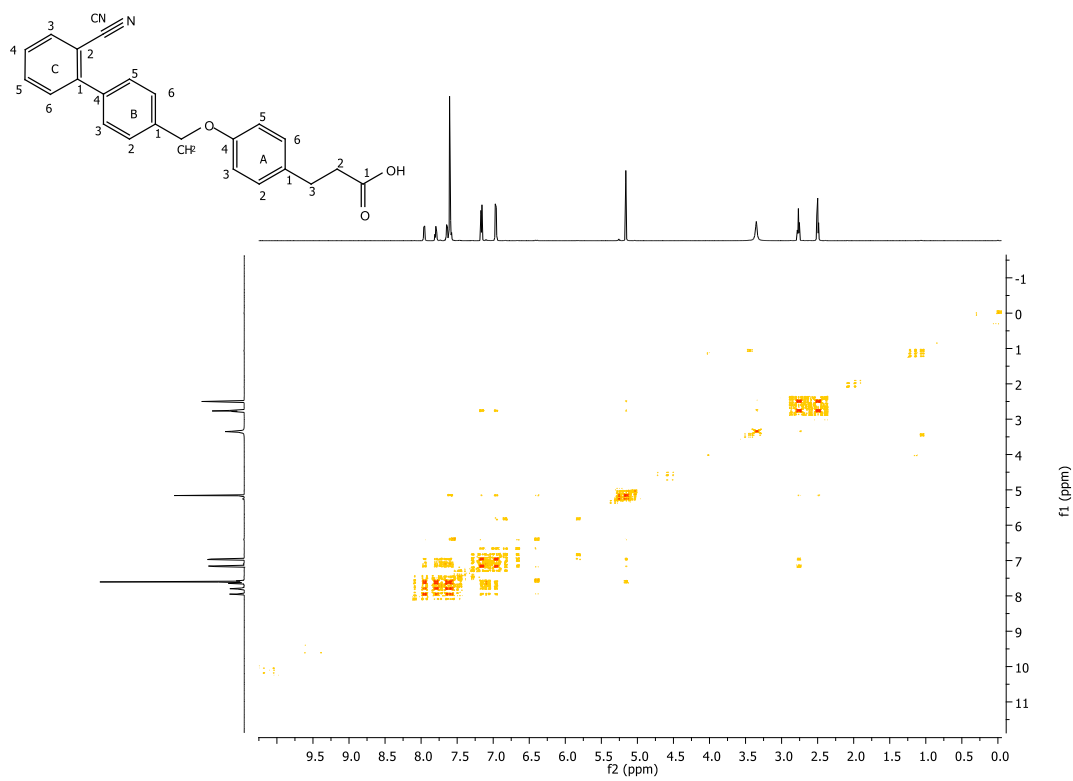

COSY of compound 3

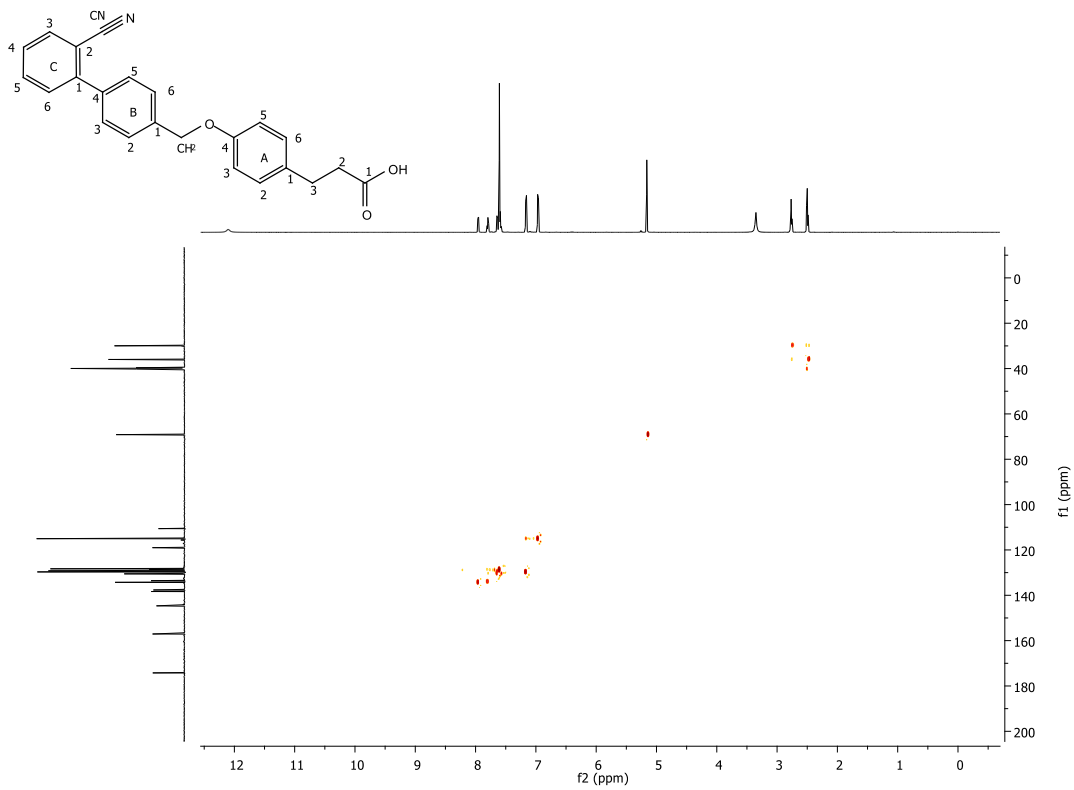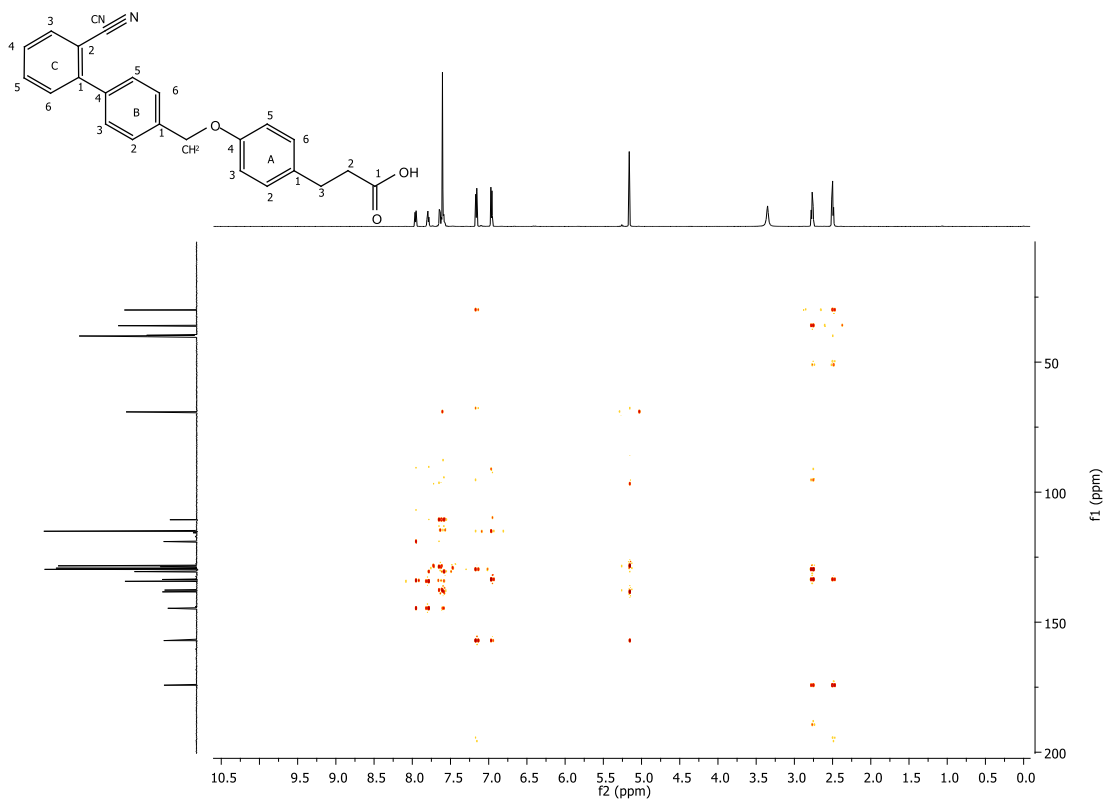

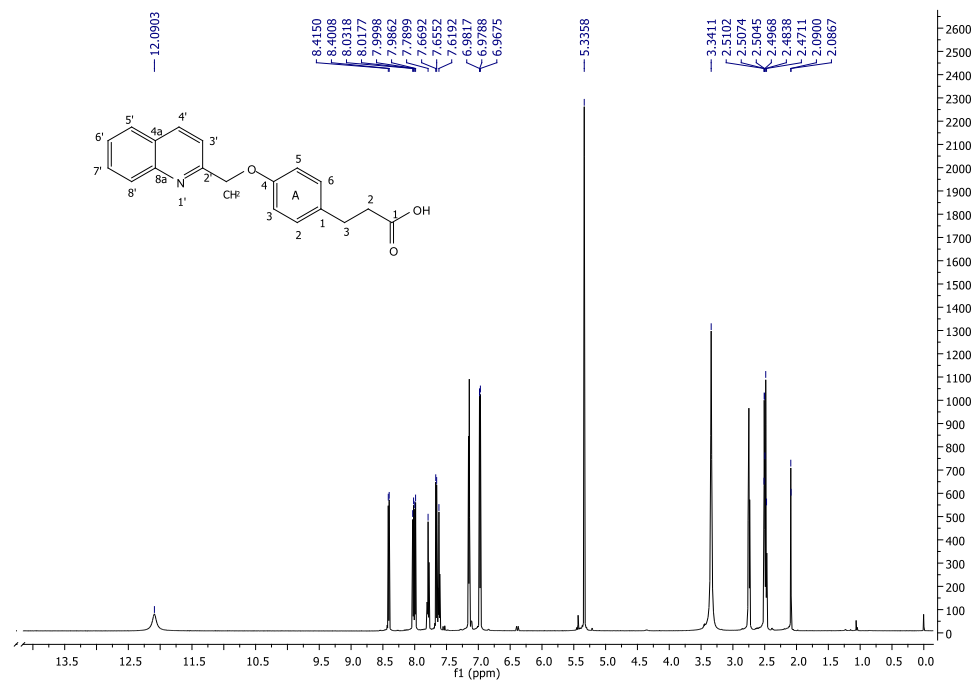

<sup>1</sup>H-NMR of compound 4

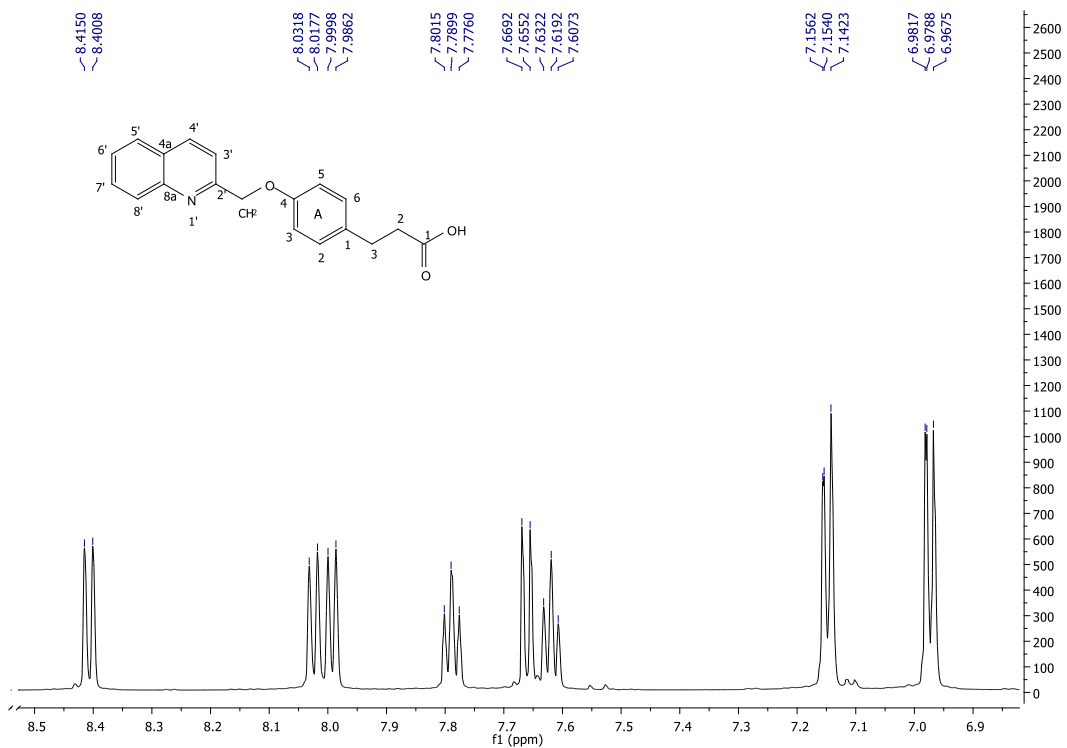

<sup>1</sup>H-NMR of compound 4 (aromatic zone expansion)

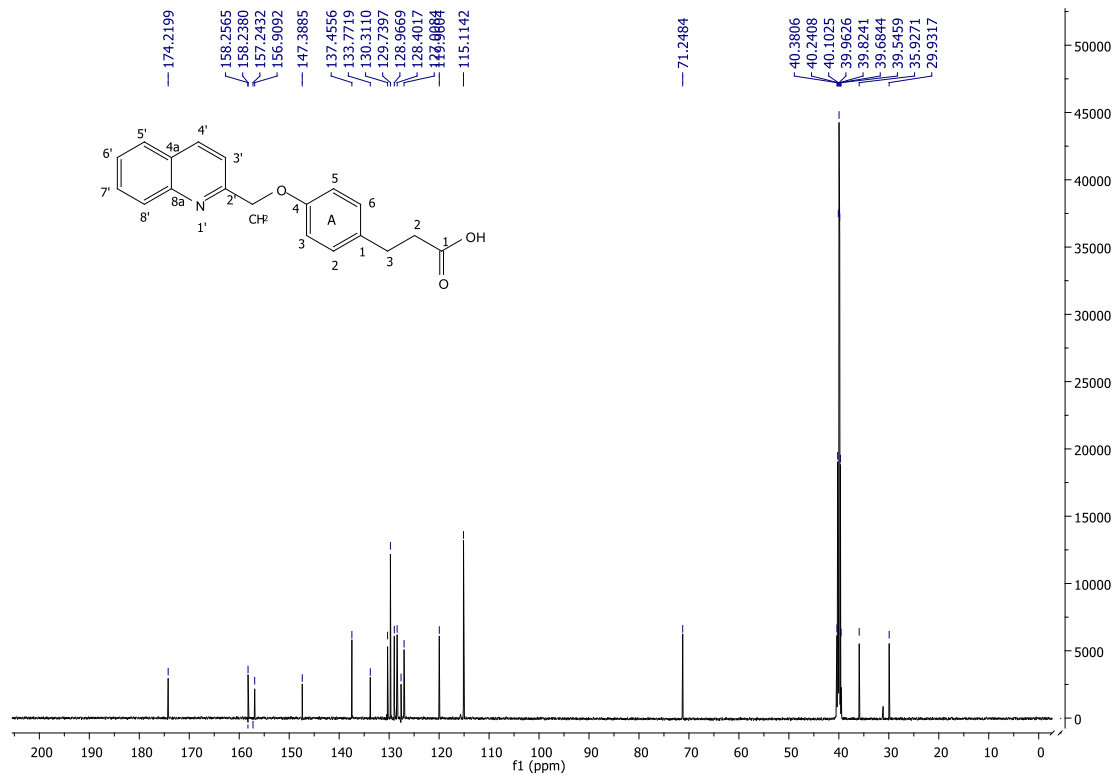

$^{13}\text{C-NMR}$  of compound 4

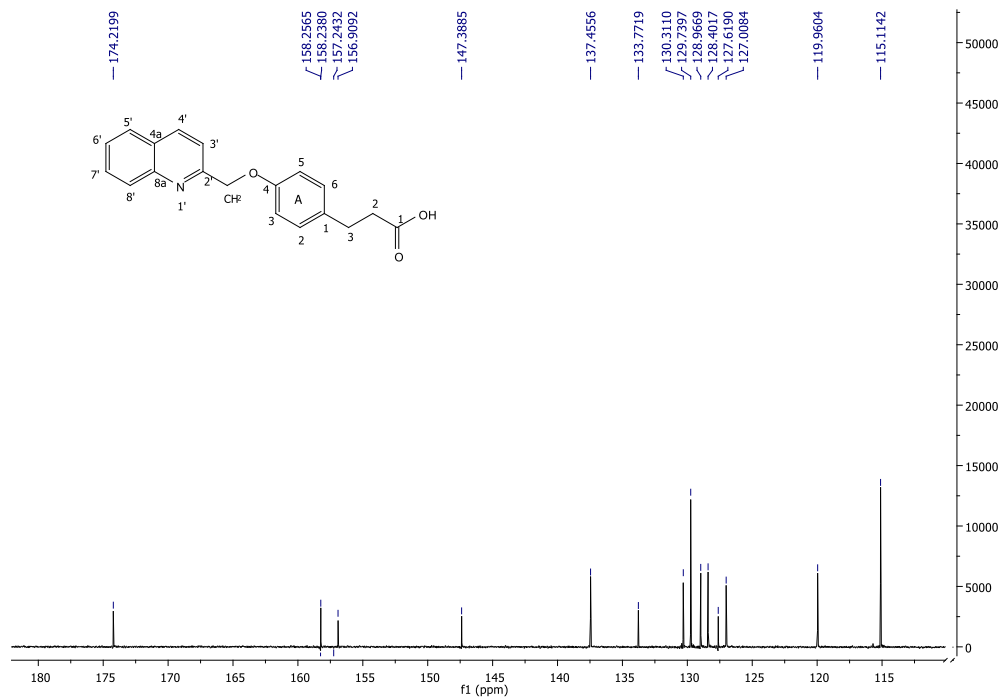

$^{13}\text{C-NMR}$  of compound 4 (aromatic zone expansion)

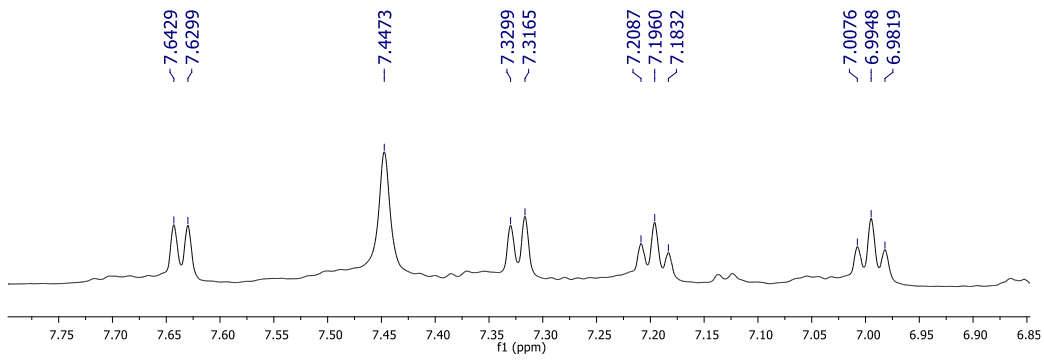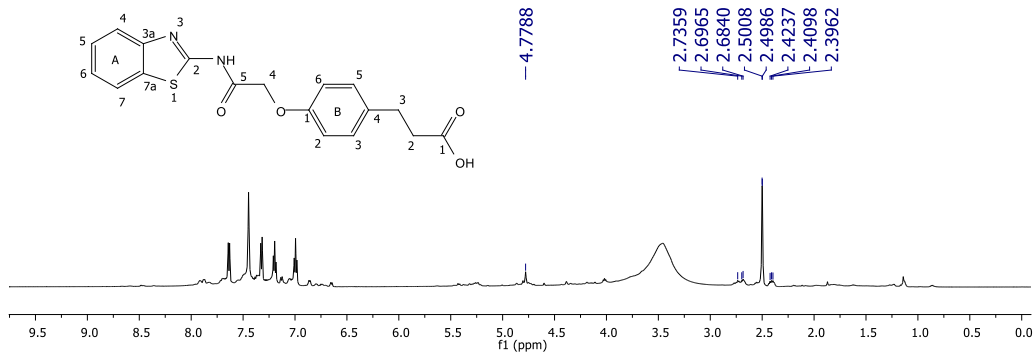

<sup>1</sup>H-NMR of compound 5 (aromatic zone expansion)

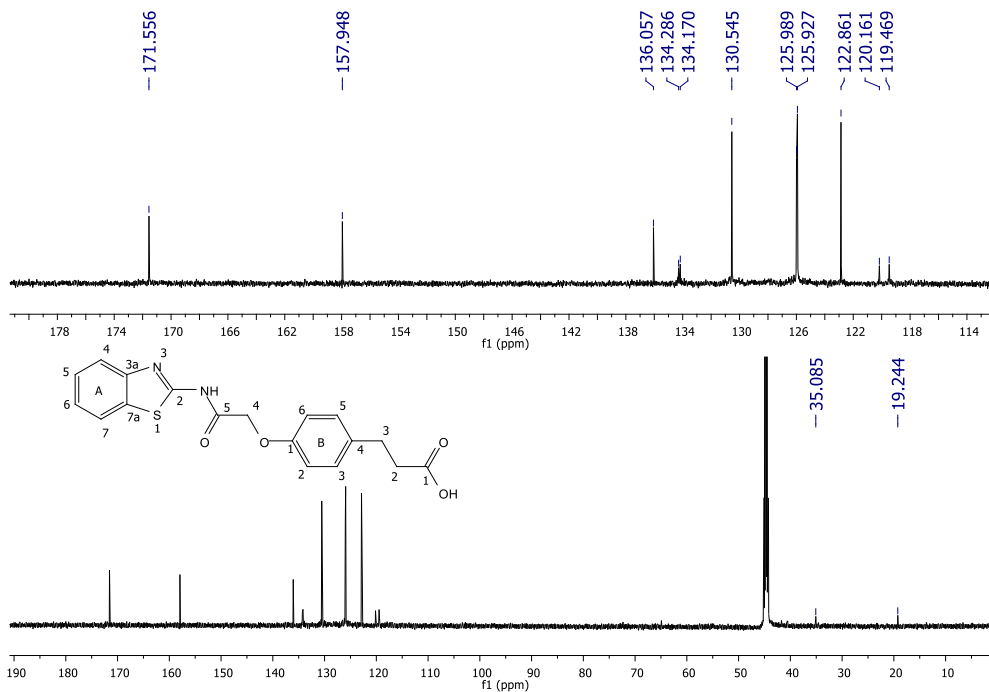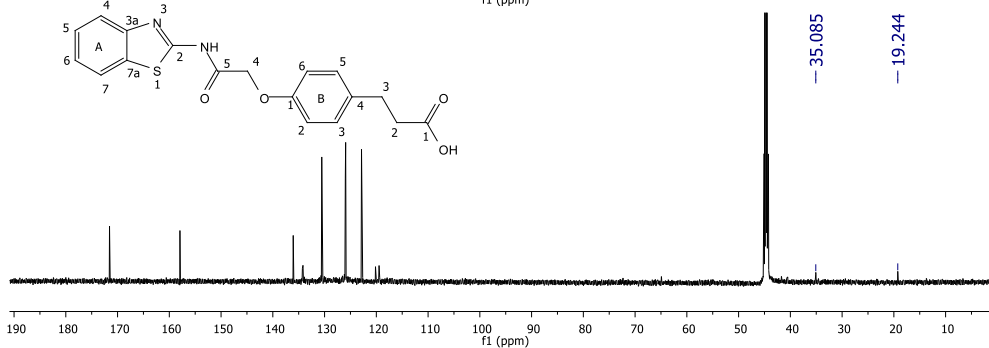

<sup>13</sup>C-NMR compound 5 (aromatic zone expansion)
